# Supplementary material for: Polycrystalline Er-doped Y3Ga5O12 nanofilms fabricated by atomic layer deposition on silicon at a low temperature and the exploration on electroluminescence performance
Source: Royal Society of Chemistry journal article supplement (doi:10.1039/d2nr03118c), 2022-01-01
Supplement: d2nr03118c1.pdf [file d2nr03118c1.pdf]

## Supporting Information

### Polycrystalline Er-doped $\text{Y}_3\text{Ga}_5\text{O}_{12}$ nanofilms fabricated by atomic layer deposition on silicon at low temperature and the exploration on electroluminescent performance

Zhimin Yu, Kang Yuan, Yang Yang, Jiaming Sun

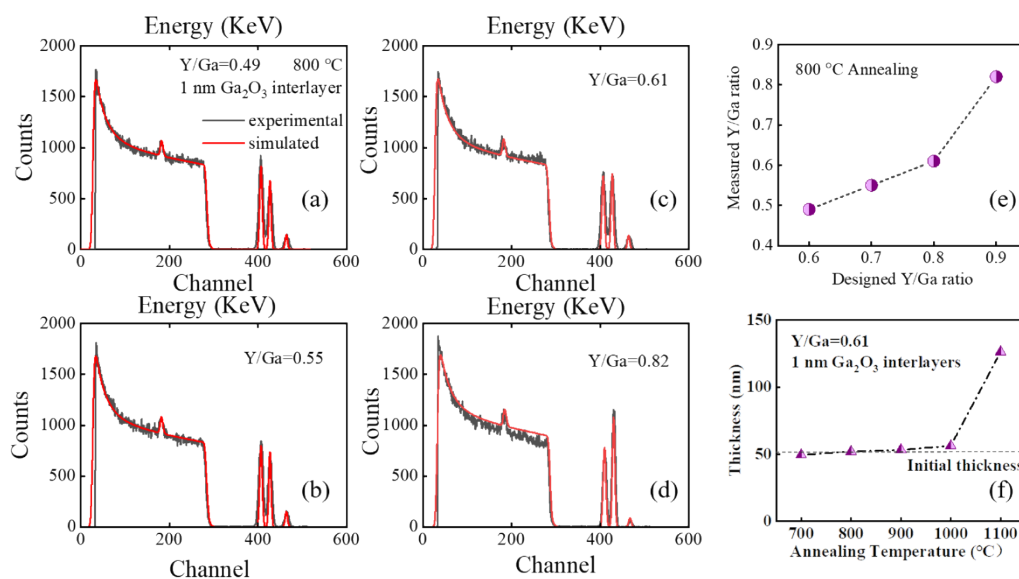

**Fig. S1** (a-d) The RBS signals from the YGG:Er nanofilms with different compositions (nominal designed Y/Ga = 0.6, 0.7, 0.8 and 0.9) after annealing at 800 °C, the fitting results are compared in (e). (f) The dependence of film thickness on annealing temperature for the YGG:Er nanofilm with Y/Ga=0.61.

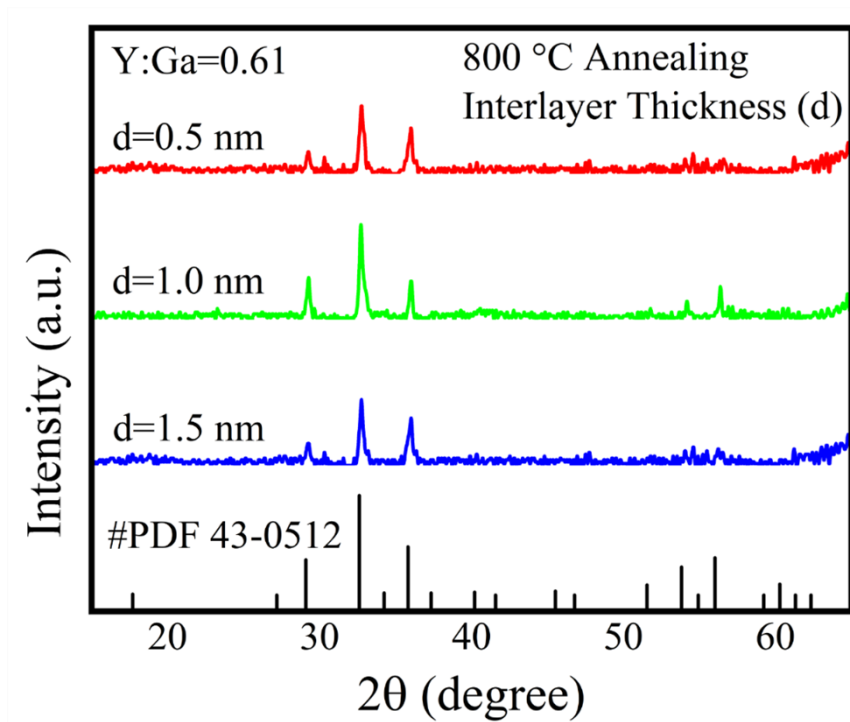

**Fig. S2** XRD patterns of the 800 °C annealed YGG:Er (Y/Ga=0.61) nanofilms with different Ga<sub>2</sub>O<sub>3</sub> interlayer thickness (d = 0.5/1.5 nm).

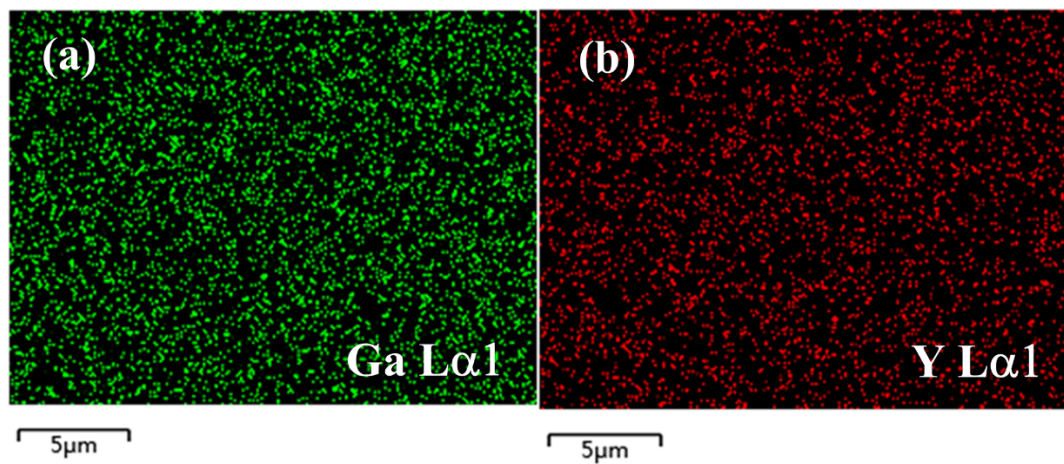

**Fig. S3** EDS mapping of the 800 °C annealed YGG:Er (Y/Ga=0.61) nanofilms.

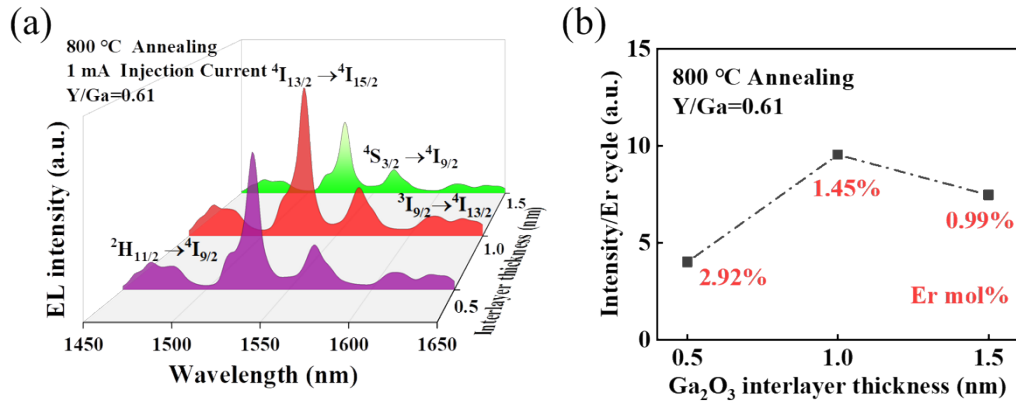

**Fig. S4** For the MOSLEDs based on the polycrystalline YGG:Er (Y/Ga=0.61) nanofilms annealed at 800 °C. (a) The NIR EL spectra from the MOSLEDs with different Ga<sub>2</sub>O<sub>3</sub> interlayer thickness ( $d = 0.5/1/1.5$  nm) under the same injection current, and (b) The comparison of the 1530 nm EL intensities from each Er<sub>2</sub>O<sub>3</sub> dopant cycle as a function of the Ga<sub>2</sub>O<sub>3</sub> interlayer thickness (different Er doping concentrations).

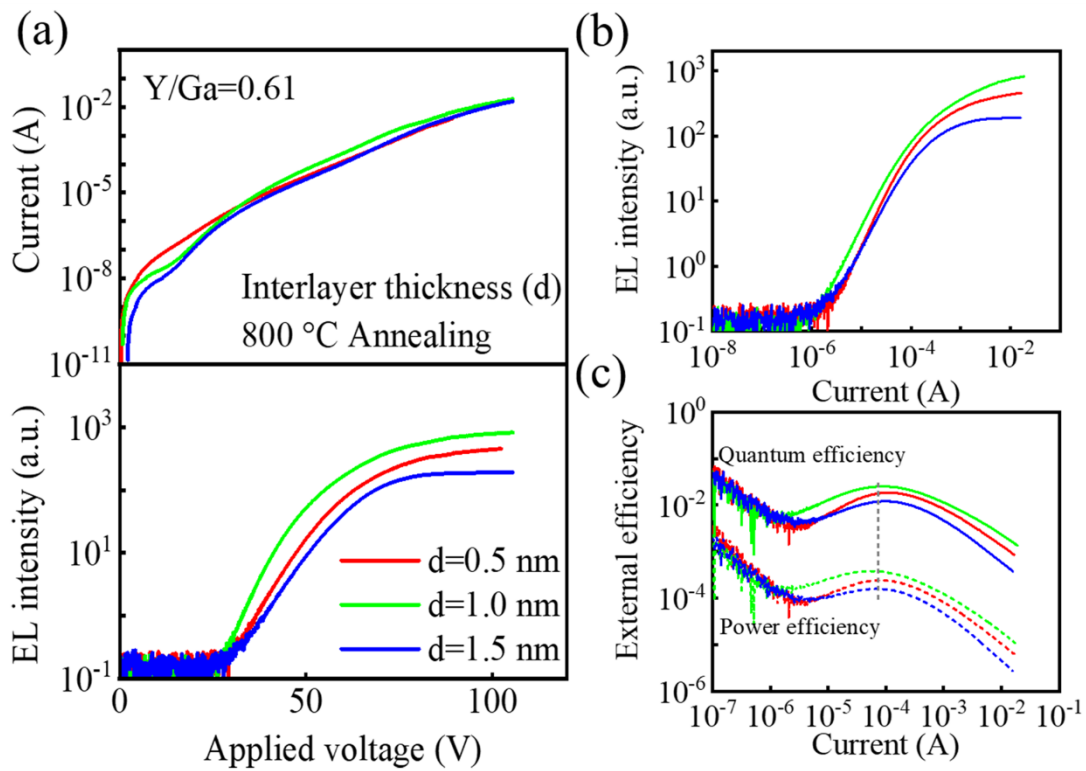

**Fig. S5** For the YGG:Er (Y/Ga=0.61, annealed at 800 °C) MOSLEDs with Ga<sub>2</sub>O<sub>3</sub> interlayers of different thicknesses. The dependence of (a) 1530 nm EL intensities and injection currents on the applied voltages, (b) the EL-I relationship, and (c) their power efficiencies and external quantum efficiencies as a function of the injection currents.

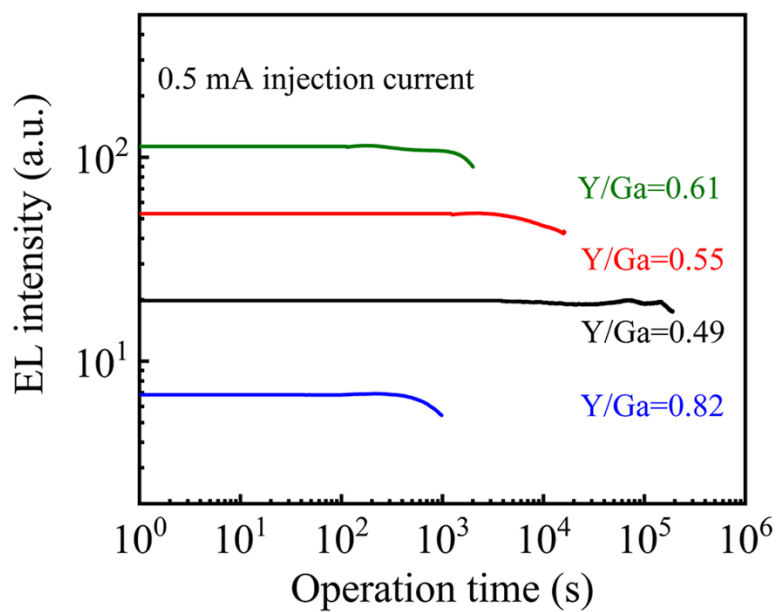

**Fig. S6** The EL intensity recorded continually for the 800 °C annealed YGG:Er MOSLEDs with different Y/Ga ratios, which were recorded continually under 0.5 mA.
